# Supplementary material for: The Influence of Magnetic Fields on Electrophoretic Processes in Magnetic Colloids with Different Stabilization Mechanisms
Source: MDPI journal article supplement (doi:10.3390/magnetochemistry9090207), 2023-08-30
Supplement: s1 [file s1]

# The influence of magnetic fields on electrophoretic processes in magnetic colloids with different stabilization mechanisms

Yurii I. Dikansky<sup>1,\*</sup>, Andrey S. Drozdov<sup>2</sup>, Inna V. Eskova<sup>1</sup> and Elena S. Beketova<sup>1</sup>

<sup>1</sup> Department of Experimental Physics, Physical Technical Faculty, North Caucasus Federal University, 355017 Stavropol, Russia; i.tatova@inbox.ru (I.V.E.); tkacheva\_es.86@mail.ru (E.S.B.)

<sup>2</sup> Laboratory of Nanobiotechnologies, Moscow Institute of Mechanics and Technology, Institute Ave. 9, 141701 Dolgoprudny, Russia; drozdov.science@gmail.com

\* Correspondence: dikansky@mail.ru

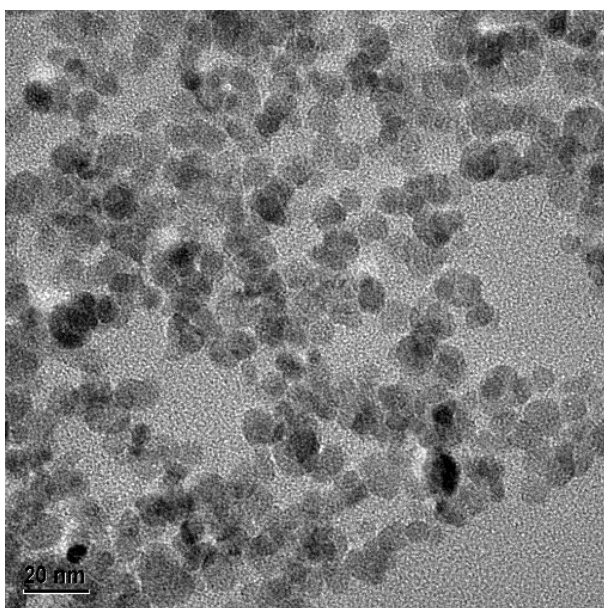

**Figure S1.** TEM image of Sample №1.

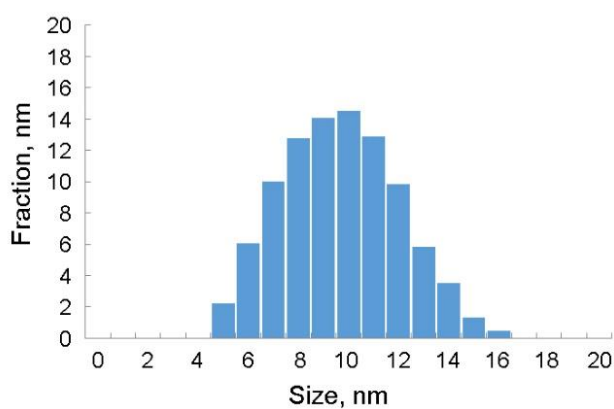

**Figure S2.** Size distribution diagram of Sample №1.

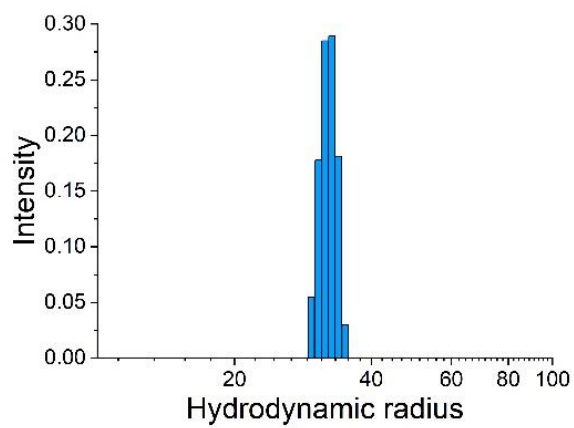

**Figure S3.** DLS analysis data of Sample №1.

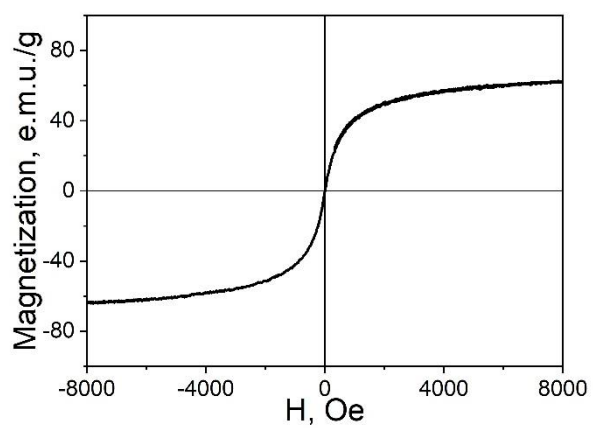

**Figure S4.** Magnetization curve of Sample №1.

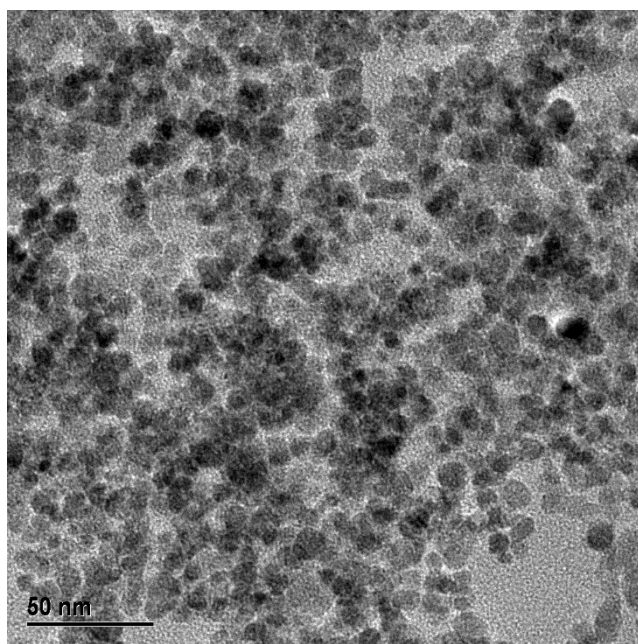

**Figure S5.** TEM image of Sample №2.

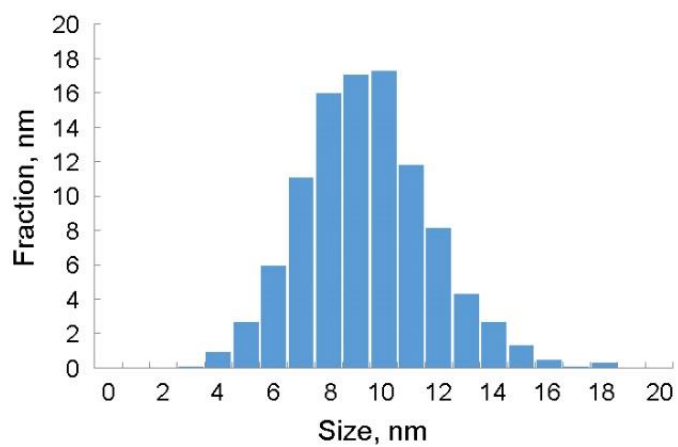

**Figure S6.** Size distribution diagram of Sample №2.

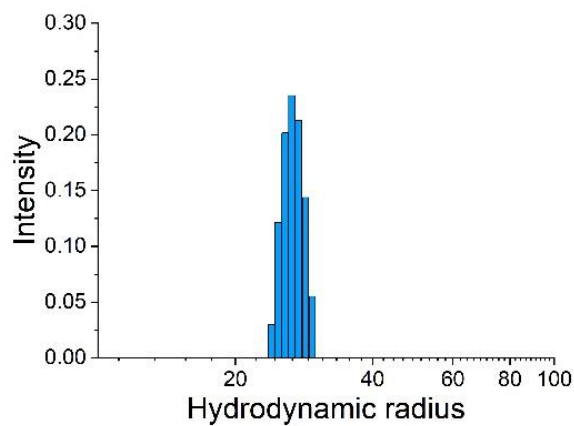

**Figure S7.** DLS analysis data of Sample №2.

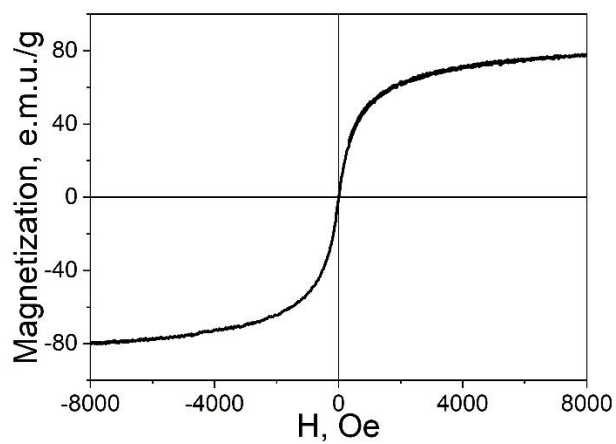

**Figure S8.** Magnetization curve of Sample №2.
